# Supplementary material
Source: PubMed Central journal article supplement (PMC7580169)
Supplement: DS_10.1177_0022034520935854.pdf [file DS_10.1177_0022034520935854.pdf]

# **EDUCATION-RELATED INEQUALITIES IN DENTAL SERVICES USE AMONG OLDER ADULTS IN 23 COUNTRIES**

Bof de Andrade F, Antunes JLF, Andrade FCD, Lima-Costa MFF, Macinko J

APPENDIX

Appendix Table 1 – Independent variables by country

|                | N       | Age               | Partnered         | Chronic <sup>a</sup> | Disability <sup>b</sup> | Rural             | Insurance <sup>c</sup> |
|----------------|---------|-------------------|-------------------|----------------------|-------------------------|-------------------|------------------------|
|                |         | Mean              | Yes               | Yes                  | Yes                     | Rural             | Private                |
|                |         | % (95% CI)        | % (95% CI)        | % (95% CI)           | % (95% CI)              | % (95% CI)        | % (95% CI)             |
| Austria        | 3,091   | 66.5 (66.0, 67.0) | 59.8 (57.6, 62.0) | 74.5 (72.2, 76.6)    | 10.7 (9.5, 12.0)        | 47.8 (45.6, 50.1) | 21.5 (19.7, 23.3)      |
| Belgium        | 5,446   | 65.8 (65.4, 66.2) | 64.8 (63.1, 66.5) | 79.4 (77.7, 80.9)    | 15.2 (14.1, 16.4)       | 20.5 (19.3, 21.7) | 81.9 (80.6, 83.2)      |
| Brazil         | 9,256   | 62.5 (62.3, 62.7) | 63.7 (62.5, 64.9) | 68.4 (67.2, 69.6)    | 16.0 (15.1, 16.9)       | 15.3 (14.5, 16.2) | 24.6 (23.6, 25.7)      |
| China          | 15,118  | 63.2 (62.9, 63.4) | 83.3 (82.4, 84.1) | 74.4 (73.3, 75.4)    | 20.2 (19.3, 21.1)       | 53.0 (51.8, 54.2) | 2.8 (2.2, 3.6)         |
| Croatia        | 2,380   | 66.0 (65.5, 66.5) | 63.2 (60.9, 65.5) | 68.4 (66.3, 70.4)    | 12.2 (10.8, 13.8)       | 32.0 (30.0, 34.1) | 89.8 (88.3, 91.1)      |
| Czech Republic | 4,286   | 65.3 (64.6, 65.9) | 66.4 (63.6, 69.0) | 82.5 (79.4, 85.2)    | 12.6 (10.8, 14.7)       | 28.6 (26.0, 31.4) | 7.1 (5.4, 9.4)         |
| Denmark        | 3,565   | 65.7 (65.3, 66.0) | 62.3 (60.5, 64.0) | 75.5 (74.0, 77.0)    | 8.7 (7.7, 9.7)          | 21.7 (20.4, 23.2) | 47.3 (45.6, 49.0)      |
| Estonia        | 4,980   | 66.4 (66.1, 66.7) | 48.4 (46.9, 49.9) | 80.4 (79.1, 81.6)    | 15.2 (14.2, 16.3)       | 33.5 (32.1, 35.0) | 3.2 (2.7, 3.8)         |
| France         | 3,734   | 66.0 (65.5, 66.4) | 62.5 (60.7, 64.2) | 77.3 (75.5, 78.9)    | 14.1 (12.9, 15.3)       | 43.4 (41.6, 45.1) | 94.5 (93.5, 95.4)      |
| Germany        | 4,199   | 66.3 (66.0, 66.7) | 62.4 (60.6, 64.1) | 80.5 (79.1, 81.8)    | 12.0 (10.9, 13.3)       | 38.7 (37.1, 40.4) | 27.9 (26.4, 29.5)      |
| Greece         | 4,661   | 66.8 (66.5, 67.2) | 71.2 (69.7, 72.6) | 69.1 (67.6, 70.6)    | 8.4 (7.6, 9.3)          | 18.4 (17.3, 19.7) | 4.6 (4.0, 5.3)         |
| Israel         | 1,689   | 66.0 (65.2, 66.8) | 71.6 (67.0, 75.7) | 70.6 (65.8, 75.0)    | 10.4 (8.8, 12.2)        | 9.0 (5.8, 13.7)   | 45.9 (41.7, 50.2)      |
| Italy          | 4,784   | 66.6 (66.2, 67.1) | 66.9 (65.1, 68.7) | 72.2 (70.4, 73.9)    | 11.5 (10.4, 12.7)       | 31.3 (29.7, 32.9) | 5.4 (4.6, 6.3)         |
| Luxembourg     | 1,495   | 64.6 (63.8, 65.3) | 63.6 (60.5, 66.7) | 76.7 (73.5, 79.5)    | 9.3 (7.7, 11.0)         | 37.1 (34.1, 40.2) | 75.9 (72.9, 78.6)      |
| Mexico         | 13,676  | 64.7 (64.3, 65.0) | 66.1 (64.3, 67.9) | 57.9 (56.1, 59.8)    | 17.1 (15.9, 18.4)       | 36.6 (35.0, 38.3) | 30.0 (28.2, 31.8)      |
| Poland         | 1,587   | 64.8 (64.2, 65.4) | 60.8 (57.8, 63.7) | 75.7 (3.0, 7 8.3)    | 14.9 (13.1, 16.9)       | 47.4 (44.6, 50.3) | 8.5 (6.9, 10.3)        |
| Portugal       | 1,553   | 66.8 (65.7, 67.8) | 75.7 (70.4, 80.4) | 78.0 (71.8, 8 3.2)   | 20.8 (16.8, 25.5)       | 28.8 (24.1, 33.9) | 22.6 (18.4, 27.4)      |
| Slovenia       | 3,948   | 65.3 (64.9, 65.8) | 67.0 (65.1, 68.8) | 73.3 (71.4, 7 5.1)   | 12.2 (11.1, 13.4)       | 56.5 (54.6, 58.3) | 82.7 (81.3, 84.1)      |
| S. Korea       | 6,617   | 67.5 (67.3, 67.7) | 62.6 (61.1, 64.0) | 63.2 (61.8, 64.6)    | 3.9 (3.5, 4.4)          | 21.3 (20.3, 22.4) | 40.3 (38.8, 41.7)      |
| Spain          | 4,981   | 66.6 (66.0, 67.3) | 69.0 (66.2, 71.7) | 79.2 (76.0, 8 2.0)   | 11.2 (9.9, 12.7)        | 7.2 (5.9, 8.8)    | 11.8 (9.8, 14.2)       |
| Sweden         | 3,529   | 66.7 (66.3, 67.2) | 61.4 (59.3, 63.5) | 71.2 (69.1, 7 3.2)   | 9.2 (8.1, 10.4)         | 35.0 (33.0, 37.0) | 17.2 (15.5, 19.0)      |
| Switzerland    | 2,598   | 66.2 (65.7, 66.6) | 61.2 (59.0, 63.4) | 70.5 (68.4, 7 2.5)   | 7.0 (6.0, 8.1)          | 52.3 (50.1, 54.5) | 78.9 (77.1, 80.7)      |
| United States  | 16,848  | 67.0 (66.8, 67.2) | 60.2 (59.3, 61.1) | 85.8 (85.1, 8 6.6)   | 16.3 (15.7, 17.0)       | 26.7 (25.9, 27.5) | 45.5 (44.5, 46.4)      |
| Total          | 124,021 | 64.3 (64.2, 64.5) | 75.6 (75.0, 76.2) | 75.6 (74.9, 7 6.2)   | 17.7 (17.1, 18.2)       | 44.6 (43.9, 45.3) | 16.3 (15.8, 16.8)      |

<sup>a</sup>Any chronic disease (arthritis, cancer, chronic lung disease, diabetes, heart disease, hypertension, stroke).

<sup>b</sup>Any limitation in basic activities of daily living

<sup>c</sup>Private health insurance.
